# Supplementary material for: Barbiturates with hydrogen-bonded layer and framework structures
Source: Royal Society of Chemistry journal article supplement (doi:10.1039/c1ce05430a), 2011-01-01
Supplement: c1ce05430a.pdf [file c1ce05430a.pdf]

Supporting Information

**Barbiturates with hydrogen-bonded layer and framework structures**

Thomas Gelbrich, Denise Rossi, Clemens A. Häfele and Ulrich J. Griesser

|                                                                  |     |
|------------------------------------------------------------------|-----|
| 1. Geometrical parameters of N–H···O bonds                       | S-2 |
| 2. Second-level graph-set representations of H-bonded structures | S-3 |
| 3. <i>XPac</i> comparison between <b>2a</b> and <b>3b</b>        | S-4 |
| 4. H-bonded structures L-2 and L-3                               | S-5 |
| References                                                       | S-5 |

## 1. Geometrical parameters of N–H...O bonds

**Table S1.** Hydrogen bonds for form II of noctal (**1**; L-4).

| # | D–H...A                  | $d(D-H) / \text{Å}$ | $d(H...A) / \text{Å}$ | $d(D...A) / \text{Å}$ | $\angle(DHA) / ^\circ$ |
|---|--------------------------|---------------------|-----------------------|-----------------------|------------------------|
| a | N1–H1...O4 <sup>i</sup>  | 0.871(19)           | 2.06(2)               | 2.934(4)              | 178(4)                 |
| b | N3–H3...O2 <sup>ii</sup> | 0.875(19)           | 1.96(2)               | 2.832(4)              | 172(4)                 |

Symmetry transformations used to generate equivalent atoms: (i)  $x, -y+1/2, z-1/2$  (ii)  $-x+2, -y, -z$ .

**Table S2.** Hydrogen bonds for form A of 5,5-dichlorobarbituric acid (**2a**; L-5).

| # | D–H...A                      | $d(D-H) / \text{Å}$ | $d(H...A) / \text{Å}$ | $d(D...A) / \text{Å}$ | $\angle(DHA) / ^\circ$ |
|---|------------------------------|---------------------|-----------------------|-----------------------|------------------------|
| a | N1A–H1A...O2B                | 0.866(18)           | 2.11(2)               | 2.953(4)              | 164(3)                 |
| b | N3A–H3A...O4D <sup>i</sup>   | 0.865(18)           | 2.19(2)               | 2.992(4)              | 155(3)                 |
| c | N1B–H1B...O2A                | 0.866(18)           | 2.15(2)               | 2.970(4)              | 159(3)                 |
| d | N3B–H3B...O4C <sup>ii</sup>  | 0.849(18)           | 2.22(2)               | 3.025(3)              | 158(3)                 |
| e | N1C–H1C...O2D                | 0.847(18)           | 2.08(2)               | 2.920(3)              | 172(3)                 |
| f | N3C–H3C...O4B                | 0.852(18)           | 2.23(2)               | 3.033(3)              | 157(3)                 |
| g | N1D–H1D...O2C                | 0.864(18)           | 2.11(2)               | 2.928(4)              | 158(3)                 |
| h | N3D–H3D...O4A <sup>iii</sup> | 0.886(18)           | 2.23(2)               | 3.041(3)              | 153(3)                 |

Symmetry transformations used to generate equivalent atoms: (i)  $x-1/2, y+1/2, z$  (ii)  $x+1/2, y+1/2, z$  (iii)  $x, y-1, z$ .

**Table S3.** Hydrogen bonds for form B of 5,5-dibromobarbituric acid (**2b**; L-6).

| # | D–H...A                      | $d(D-H) / \text{Å}$ | $d(H...A) / \text{Å}$ | $d(D...A) / \text{Å}$ | $\angle(DHA) / ^\circ$ |
|---|------------------------------|---------------------|-----------------------|-----------------------|------------------------|
| a | N1A–H1A...O4A <sup>i</sup>   | 0.846(16)           | 2.028(17)             | 2.853(2)              | 165(2)                 |
| b | N3A–H3A...O2B                | 0.849(15)           | 1.938(16)             | 2.786(2)              | 176(2)                 |
| c | N1B–H1B...O4B <sup>ii</sup>  | 0.843(16)           | 1.980(18)             | 2.765(2)              | 155(2)                 |
| d | N3B–H3B...O2A                | 0.867(16)           | 1.964(17)             | 2.823(2)              | 170(2)                 |
| e | N1C–H1C...O2C <sup>iii</sup> | 0.862(15)           | 1.961(16)             | 2.820(2)              | 174(2)                 |
| f | N3C–H3C...O2A                | 0.859(16)           | 2.205(18)             | 3.026(2)              | 160(2)                 |

Symmetry transformations used to generate equivalent atoms: (i)  $-x+1/2, y+1/2, z$  (ii)  $-x+3/2, y-1/2, z$  (iii)  $1-x, 2-y, 1-z$ .

**Table S4.** Hydrogen bonds for form A of 5,5-dibromobarbituric acid (**3a**; L-6).

| # | D–H...A                      | $d(D-H) / \text{Å}$ | $d(H...A) / \text{Å}$ | $d(D...A) / \text{Å}$ | $\angle(DHA) / ^\circ$ |
|---|------------------------------|---------------------|-----------------------|-----------------------|------------------------|
| a | N1A–H1A...O4A <sup>i</sup>   | 0.88                | 2.01                  | 2.853(9)              | 160.5                  |
| b | N3A–H3A...O2B                | 0.88                | 1.95                  | 2.818(9)              | 170.0                  |
| c | N1B–H1B...O4B <sup>ii</sup>  | 0.88                | 1.99                  | 2.810(9)              | 153.5                  |
| d | N3B–H3B...O2A                | 0.88                | 1.96                  | 2.835(9)              | 174.3                  |
| e | N1C–H1C...O2C <sup>iii</sup> | 0.88                | 1.94                  | 2.808(9)              | 167.7                  |
| f | N3C–H3C...O2A                | 0.88                | 2.21                  | 3.053(9)              | 160.2                  |

Symmetry transformations used to generate equivalent atoms: (i)  $-x+1/2, y+1/2, z$  (ii)  $-x+3/2, y-1/2, z$  (iii)  $1-x, 2-y, 1-z$ .

**Table S5.** Hydrogen bonds for form B of 5,5-dibromobarbituric acid (**3b**; F-2).

| # | D–H...A                      | $d(D-H) / \text{Å}$ | $d(H...A) / \text{Å}$ | $d(D...A) / \text{Å}$ | $\angle(DHA) / ^\circ$ |
|---|------------------------------|---------------------|-----------------------|-----------------------|------------------------|
| a | N1A–H1A...O2A <sup>i</sup>   | 0.88(2)             | 1.97(2)               | 2.840(6)              | 168(5)                 |
| b | N3A–H3A...O4B                | 0.87(2)             | 2.02(4)               | 2.789(6)              | 146(5)                 |
| c | N1B–H1B...O4A <sup>ii</sup>  | 0.89(2)             | 1.97(2)               | 2.860(6)              | 178(6)                 |
| d | N3B–H3B...O2B <sup>iii</sup> | 0.88(2)             | 1.94(2)               | 2.820(7)              | 173(6)                 |

Symmetry transformations used to generate equivalent atoms: (i)  $-x+1, -y+1, -z+1$  (ii)  $x, -y+3/2, z-1/2$  (iii)  $-x, -y+1, -z$ .

## 2. Second-level graph-set representations<sup>1</sup> of H-bonded structures

**Table S6.** Graph-set representation<sup>1</sup> of L-4 (crystal structure **1**,  $Z' = 1$ ). For the definition of  $a$  and  $b$ , see Table S1.

---

|             |                           |
|-------------|---------------------------|
| $C_1^1(6)$  | $a$                       |
| $R_6^6(28)$ | $> b > b$                 |
| $C_2^2(8)$  | $> a > b$                 |
| $C_2^2(10)$ | $> a < b$                 |
| $C_4^4(18)$ | $> a > b < a < b$         |
| $R_6^6(28)$ | $> a > a > b > a > a > b$ |
| $R_6^6(30)$ | $> a > a > b > a > a < b$ |
| $R_6^6(32)$ | $> a > a < b > a > a < b$ |

---

**Table S7.** Graph-set representation<sup>1</sup> of L-6 (crystal structure **2a**,  $Z' = 4$ ). For the definition of  $a-h$ , see Table S2.

---

|            |           |
|------------|-----------|
| $D_1^1(2)$ | $a$       |
| $D_1^1(2)$ | $b$       |
| $D_1^1(2)$ | $c$       |
| $D_1^1(2)$ | $d$       |
| $D_1^1(2)$ | $e$       |
| $D_1^1(2)$ | $f$       |
| $D_1^1(2)$ | $g$       |
| $D_1^1(2)$ | $h$       |
| $D_2^2(6)$ | $> a > d$ |
| $D_2^2(6)$ | $> c > b$ |
| $D_2^2(6)$ | $> e > h$ |
| $D_2^2(6)$ | $> g > f$ |
| $D_2^2(7)$ | $< a > b$ |

$D_{2d}^3(7)$   $\langle c \rangle d$

$D_{2d}^3(7)$   $\langle e \rangle f$

$D_{2d}^3(7)$   $\langle g \rangle h$

$D_{2d}^3(7)$   $> a \langle f$

$D_{2d}^3(7)$   $> b \langle e$

$D_{2d}^3(7)$   $> c \langle h$

$D_{2d}^3(7)$   $> d \langle g$

$D_{2d}^3(8)$   $> b \rangle g$

$D_{2d}^3(8)$   $> d \rangle e$

$D_{2d}^3(8)$   $> f \rangle c$

$D_{2d}^3(8)$   $> h \rangle a$

$C_2^2(8)$   $> b \rangle h$

$C_2^2(8)$   $> d \rangle f$

$R_2^2(8)$   $> a \rangle c$

$R_2^2(8)$   $> e \rangle g$

---

**Table S8.** Graph-set representation<sup>1</sup> of L-5 (crystal structures **2b** and **3a**,  $Z' = 3$ ). For the definition of *a-f*, see Tables S3 and S4.

|             |          |
|-------------|----------|
| $D_1^1(2)$  | <i>b</i> |
| $D_1^1(2)$  | <i>d</i> |
| $D_1^1(2)$  | <i>f</i> |
| $C_1^1(6)$  | <i>a</i> |
| $C_1^1(6)$  | <i>c</i> |
| $R_2^2(8)$  | $>e>e$   |
| $D_2^1(3)$  | $>d<f$   |
| $D_2^2(6)$  | $>f>b$   |
| $R_2^2(8)$  | $>b>d$   |
| $D_3^3(11)$ | $<b>a>b$ |
| $D_3^3(11)$ | $<d>c>d$ |
| $D_3^3(11)$ | $<f>e>f$ |
| $D_3^3(11)$ | $>b>c<b$ |
| $D_3^3(11)$ | $>d>a<d$ |
| $D_3^3(11)$ | $>f>a<f$ |

**Table S9.** Graph-set representation<sup>1</sup> of F-2 (crystal structure **3b**,  $Z' = 2$ ). For the definition of *a-d*, see Table S5.

|             |          |
|-------------|----------|
| $D_1^1(2)$  | <i>b</i> |
| $D_1^1(2)$  | <i>c</i> |
| $R_2^2(8)$  | $>a>a$   |
| $R_2^2(8)$  | $>d>d$   |
| $C_2^2(8)$  | $>b>c$   |
| $D_3^3(11)$ | $<b>a>b$ |
| $D_3^3(11)$ | $<c>d>c$ |
| $D_3^3(13)$ | $>b>d<b$ |
| $D_3^3(13)$ | $>c>a<c$ |

**3. XPac comparison between**

**2a and 3b**

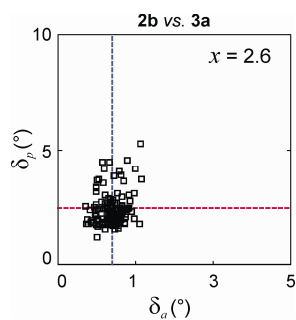

**Fig. S1** The isostructural relationship between **2b** and **3a** is indicated by a low *XPac* dissimilarity index,  $x = 2.6$ . *XPac* plot<sup>2</sup> for a representative cluster of 37 molecules ( $n = 36$ ). The  $\delta$  parameters were calculated from all non-H atomic positions ( $p = 11$ ).

#### 4. H-bonded structures L-2 and L-3

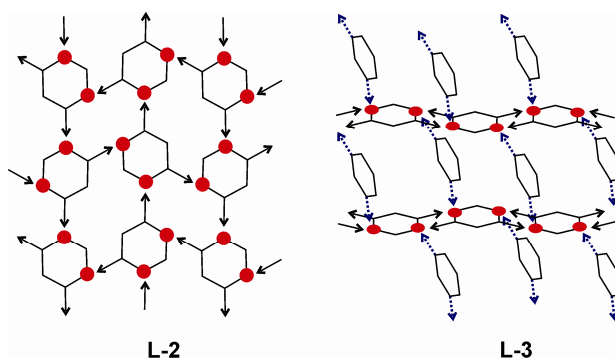

**Fig. S2** Schematic representation of the N–H...O=C bonded 2D extended structures L-2 (form II of barbituric acid) and L-3 (phenobarbital I and II). The applied style is explained in the insert of Fig. 1.

#### References

1. J. Bernstein, R. E. Davis, L. Shimoni and N.-L. Chang, *Angew. Chem. Int. Ed.*, 1995, **34**, 1555-1573.
2. (a) T. Gelbrich and M. B. Hursthouse, *CrystEngComm*, 2005, **7**, 324-336; (b) F. P. A. Fabbiani, B. Dittrich, A. J. Florence, T. Gelbrich, M. B. Hursthouse, W. F. Kuhs, N. Shankland and H. Sowa, *CrystEngComm*, 2009, **11**, 1396-1406.
